# Supplementary material
Source: PubMed Central journal article supplement (PMC2567217)
Supplement: 0804745105_0804745105SI.pdf [file 0804745105_0804745105SI.pdf]

# Supporting Information

Kim et al. 10.1073/pnas.0804745105

## SI Text

**Cell Culture.** HEK293 cells were maintained as previously described (1). The cells were transfected with cDNA encoding 2  $\mu$ g FLAG-EGFR or EGFR-GFP with FuGENE reagent (Roche). Transfected cells were incubated overnight in serum-free medium supplemented with 0.1% BSA, 10 mM Hepes (pH 7.4), and 1% penicillin before stimulation. Under serum starvation condition, cells were preincubated with ICI-118551 and either PP2, GM 6001, HB-EGF neutralizing antibody, or AG1478 for 30 min, followed by stimulation with agonists or  $\beta$ -blockers for 5 min (immunoblotting) or 20 to 30 min (confocal microscopy) as described previously (2). Cell lines stably expressing WT $\beta_1$ AR, PKA<sup>-</sup>  $\beta_1$ AR, and GRK<sup>-</sup>  $\beta_1$ AR ( $\approx$ 1 pmol/mg protein) have been previously described (3).

**Immunoblotting and Detection.** Following stimulation, cells were washed once with PBS solution, solubilized in 1 ml of lysis buffer (5 mM Hepes, 250 mM NaCl, 10% glycerol, 0.5% Nonidet P-40, 2 mM EDTA, and protease inhibitors) as previously described (1). Samples were resolved by SDS/PAGE and transferred to nitrocellulose membrane or PVDF (BioRad) for immunoblotting. Anti-phospho-EGFR (Tyr-845; Cell Signaling), phospho-ERK1/2 (Cell Signaling), and phospho-Akt (Cell Signaling) were used at 1:3,000. Immunoblotting for total EGFR (Upstate), total ERK (Upstate), and total AKT (Cell Signaling) was carried out at 1:2,000. Detection was carried out using ECL (Amersham Biosciences).  $\beta$ -Arrestin immunoblotting was carried out using A1CT rabbit polyclonal antibody at a dilution of 1:3,000 as previously described (4).

Immunoblotting for myocardial pERK was performed as previously described (5). Hearts were homogenized with Nonidet P-40 lysis buffer containing 137 mM NaCl, 20 mM Tris pH 7.4, 1%

Nonidet P-40, 20% glycerol, 10 mM PMSF, 1 mM Na<sub>3</sub>VO<sub>4</sub>, 10 mM NaF, 2.5  $\mu$ g/ml aprotinin, and 2.5  $\mu$ g/ml leupeptin.

**Confocal Laser Microscopy.** Confocal microscopy was performed as previously described (1). Briefly, HEK293 cells stably expressing FLAG-tagged WT $\beta_1$ AR and  $\beta_1$ AR mutants were transfected with cDNA encoding fluorescently labeled EGFR (i.e., EGFR-GFP, 2  $\mu$ g). Following transfection, cells were trypsinized and plated onto 35-mm collagen-coated (5  $\mu$ g/ml) glass-bottomed culture dishes (MatTek). Following stimulation, cells were washed once with PBS solution and fixed in 4% paraformaldehyde for 30 min. EGFR receptor internalization following stimulation was visualized by green fluorescence using a single sequential line of excitation filters. EGFR-GFP internalization was visualized using a combination of excitation of 488 nm and emission filters between 499 and 520 nm.

**ICUE2 cAMP Assay.** HEK293 cells stably overexpressing both the mouse  $\beta_1$ AR and the cAMP biosensor ICUE2 were generated and validated as described (6). Intracellular cAMP concentrations were measured as a FRET ratio: the CFP intensity (438/24 excitation and 483/32 emission bandpass filters; Semrock) over FRET intensity (542/27 emission filter). Experiments were performed on a NOVostar plate reader (BMG) as described previously (7). Data shown are the change in FRET ratio before and after addition of ligand.

**Statistical Analysis.** Data are expressed as mean  $\pm$  SE. Statistical significance was determined by using one-way ANOVA with Bonferroni correction for multiple comparisons or Student unpaired *t* tests. A *P* value <0.05 was considered statistically significant.

1. Naga Prasad SV, Jayatilke A, Madamanchi A, Rockman HA (2005) Protein kinase activity of phosphoinositide 3-kinase regulates beta-adrenergic receptor endocytosis. *Nat Cell Biol* 7:785–796.
2. Noma T et al. (2007) Beta-arrestin-mediated beta1-adrenergic receptor transactivation of the EGFR confers cardioprotection. *J Clin Invest* 117:2445–2458.
3. Rapacciuolo A et al. (2003) Protein kinase A and G protein-coupled receptor kinase phosphorylation mediates beta-1 adrenergic receptor endocytosis through different pathways. *J Biol Chem* 278:35403–35411.
4. Wei H et al. (2003) Independent beta-arrestin 2 and G protein-mediated pathways for angiotensin II activation of extracellular signal-regulated kinases 1 and 2. *Proc Natl Acad Sci USA* 100:10782–10787.

5. Perrino C et al. (2006) Intermittent pressure overload triggers hypertrophy-independent cardiac dysfunction and vascular rarefaction. *J Clin Invest* 116:1547–1560.
6. DiPilato LM, Cheng X, Zhang J (2004) Fluorescent indicators of cAMP and Epac activation reveal differential dynamics of cAMP signaling within discrete subcellular compartments. *Proc Natl Acad Sci USA* 101:16513–16518.
7. Wisler JW et al. (2007) A unique mechanism of beta-blocker action: carvedilol stimulates beta-arrestin signaling. *Proc Natl Acad Sci USA* 104:16657–16662.

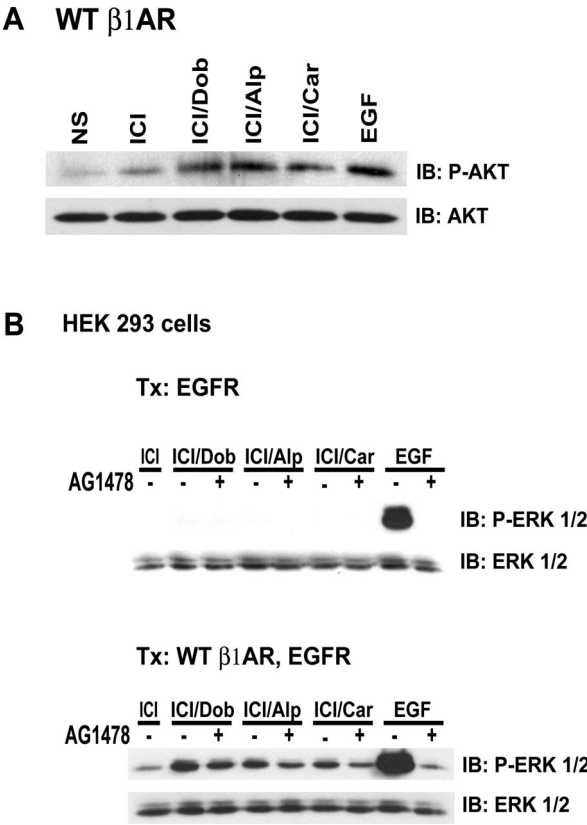

**Fig. S1.** Alp- or Car-stimulated ERK1/2 activation requires  $\beta_1$ AR expression and is sensitive to EGFR inhibition. (A) HEK 293 cells stably expressing WT  $\beta_1$ ARs with transient transfection of FLAG-EGFR are treated with Dob, Alp, Car, or EGF. Both Alp and Car induced Akt activation. (B) HEK293 cells lacking endogenous  $\beta_1$ AR expression do not elicit phosphorylation of ERK1/2, whereas those transfected with WT  $\beta_1$ ARs elicit an Alp- or Car-stimulated ERK response that is sensitive to EGFR inhibition. Tx, transient transfection.

## A WT $\beta_1$ AR

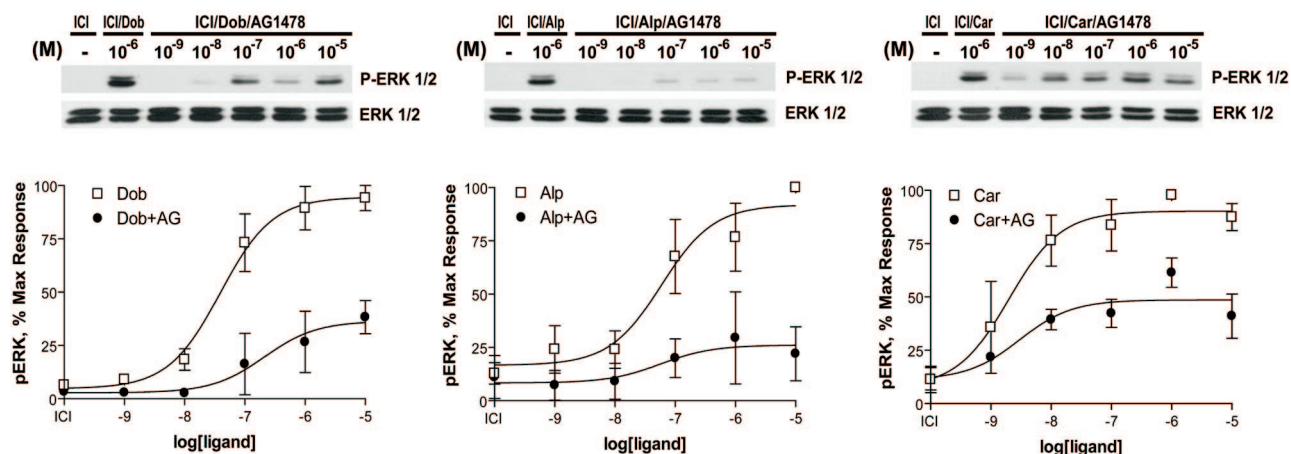

## B

### HEK-293-ICUE2- $\beta_1$ AR

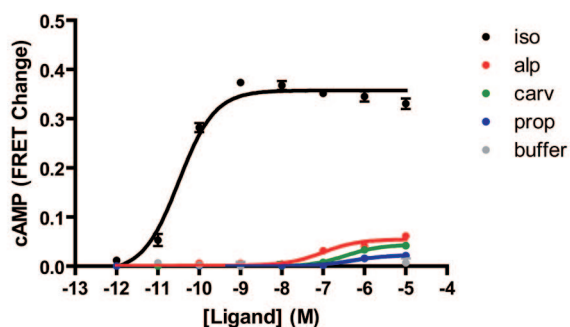

## C

### HEK-293-ICUE2

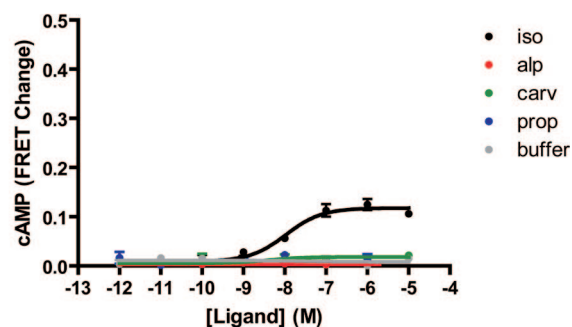

**Fig. S2.** Dose-dependent ERK responses and cAMP responses by Alp or Car. (A) Dose-dependent ERK responses by Alp or Car in the presence or absence of AG1478 (AG). HEK293 cells stably expressing WT $\beta_1$ ARs with transient transfection of FLAG-EGFR are treated with the indicated concentrations of Dob, Alp, or Car for 5 min. Whole-cell lysates were prepared and analyzed for pERK and ERK content by Western blot. Based on data in Fig. 2C in the main text, dose-response curves for ERK activation by Dob, Alp, or Car were redrawn as a percentage of maximal activity. Dose-response curves by Dob+AG, Alp+AG, or Car+AG were drawn as a relative percentage of observed activity in 1  $\mu$ M of Dob, Alp, or Car. (B and C) Efficacy profiles of Alp and Car on G protein-dependent signaling pathway. cAMP responses are monitored by ICUE2 in HEK293 cells stably expressing  $\beta_1$ AR and the cAMP biosensor ICUE2 (B) and HEK 293 cells stably expressing the cAMP biosensor ICUE2 (C). Cells are treated for 3 min with a panel of ligands. cAMP agonism is measured as the rate of change of the ICUE2 FRET ratio corresponding to the rate of cAMP accumulation. Experiments are performed on a NOVOstar plate reader. Both Alp and Car show very slight activation of  $\beta_1$ AR G protein-dependent signaling in only the range from 1 to 10  $\mu$ M. Data represent mean  $\pm$  SE of at least five independent experiments.
